# Supplementary material for: Molecular networks discriminating mouse bladder responses to intravesical bacillus Calmette-Guerin (BCG), LPS, and TNF-α
Source: PubMed Central journal article supplement (PMC2262873; doi:10.1186/1471-2172-9-4), 2008-02-11
Supplement: 1471-2172-9-4-S1.pdf [file 1471-2172-9-4-S1.pdf]

Table 1 TNF-specific genes

| TNF      |           |         |                                                                      |                     |                            |
|----------|-----------|---------|----------------------------------------------------------------------|---------------------|----------------------------|
| DETRUSOR | ID        | Genes   | Description                                                          | Location            | Type                       |
|          | AF010305  | BHLHB2  | basic helix-loop-helix domain containing, class B, 2                 | Nucleus             | transcription regulator    |
|          | NM_016787 | BNIP2   | BCL2/adenovirus E1B 19kDa interacting protein 2                      | Cytoplasm           | other                      |
|          | NM_010796 | CLEC10A | C-type lectin domain family 10, member A                             | Plasma Membrane     | other                      |
|          | NM_007875 | DPAGT1  | dolichyl-phosphate (UDP-N-acetylglucosamine)                         | Cytoplasm           | enzyme                     |
|          | L21671    | EPS8    | epidermal growth factor receptor pathway substrate 8                 | Plasma Membrane     | peptidase                  |
|          | NM_010356 | GSTA3   | glutathione S-transferase A3                                         | Cytoplasm           | enzyme                     |
|          | S73496    | LIFR    | leukemia inhibitory factor receptor alpha                            | Plasma Membrane     | transmembrane receptor     |
|          | U08354    | MC5R    | melanocortin 5 receptor                                              | Plasma Membrane     | G-protein coupled receptor |
|          | NM_011014 | OPRS1   | opioid receptor, sigma 1                                             | Plasma Membrane     | G-protein coupled receptor |
|          | NM_011057 | PDGFB   | platelet-derived growth factor beta polypeptide                      | Extracellular Space | growth factor              |
|          | NM_008883 | PLXNA3  | plexin A3                                                            | Plasma Membrane     | transmembrane receptor     |
|          | NM_008856 | PRKCH   | protein kinase C, eta                                                | Cytoplasm           | kinase                     |
|          | Z22819    | RAB24   | RAB24, member RAS oncogene family                                    | Cytoplasm           | enzyme                     |
|          | NM_011235 | RAD51L3 | RAD51-like 3 (S. cerevisiae)                                         | Nucleus             | enzyme                     |
|          | NM_009063 | RGS5    | regulator of G-protein signalling 5                                  | Plasma Membrane     | other                      |
|          | U29056    | SLA     | Src-like-adaptor                                                     | Plasma Membrane     | other                      |
|          | NM_009288 | STK10   | serine/threonine kinase 10                                           | Cytoplasm           | kinase                     |
| TNF      |           |         |                                                                      |                     |                            |
| MUCOSA   | ID        | Genes   | Description                                                          | Location            | Type                       |
|          | L07049    | ACAN    | aggrecan                                                             | Extracellular Space | other                      |
|          | D12487    | CHAT    | choline acetyltransferase                                            | Nucleus             | enzyme                     |
|          | NM_010338 | GPR37   | G protein-coupled receptor 37 (endothelin receptor type B-like)      | Plasma Membrane     | G-protein coupled receptor |
|          | NM_010476 | HSD17B7 | hydroxysteroid (17-beta) dehydrogenase 7                             | Cytoplasm           | enzyme                     |
|          | NM_016692 | INCENP  | inner centromere protein antigens 135/155kDa                         | Nucleus             | other                      |
|          | NM_017404 | MRPL39  | mitochondrial ribosomal protein L39                                  | Cytoplasm           | other                      |
|          | M12731    | MYCN    | v-myc myelocytomatosis viral related oncogene, neuroblastoma derived | Nucleus             | transcription regulator    |
|          | NM_017373 | NFIL3   | nuclear factor, interleukin 3 regulated                              | Nucleus             | transcription regulator    |
|          | NM_019955 | RIPK3   | receptor-interacting serine-threonine kinase 3                       | Plasma Membrane     | kinase                     |
|          | NM_011325 | SCNN1B  | sodium channel, nonvoltage-gated 1, beta                             | Plasma Membrane     | ion channel                |
|          | NM_011709 | WAP     | whey acidic protein                                                  | Extracellular Space | other                      |
