# Supplementary material for: Molecular networks discriminating mouse bladder responses to intravesical bacillus Calmette-Guerin (BCG), LPS, and TNF-α
Source: PubMed Central journal article supplement (PMC2262873; doi:10.1186/1471-2172-9-4), 2008-02-11
Supplement: 1471-2172-9-4-S2.pdf [file 1471-2172-9-4-S2.pdf]

Table 2 LPS-specific genes

| LPS      |           |         |                                                                    |                     |                                   |
|----------|-----------|---------|--------------------------------------------------------------------|---------------------|-----------------------------------|
| DETRUSOR | ID        | Genes   | Description                                                        | Location            | Type                              |
|          | L41145    | BMP5    | bone morphogenetic protein 5                                       | Extracellular Space | growth factor                     |
|          | NM_009131 | CLEC11A | C-type lectin domain family 11, member A                           | Extracellular Space | growth factor                     |
|          | NM_009146 | FRRS1   | ferric-chelate reductase 1                                         | Plasma Membrane     | transmembrane receptor            |
|          | NM_008131 | GLUL    | glutamate-ammonia ligase (glutamine synthetase)                    | Cytoplasm           | enzyme                            |
|          | NM_010774 | MBD4    | methyl-CpG binding domain protein 4                                | Nucleus             | enzyme                            |
|          | NM_016682 | SAE2    | SUMO1 activating enzyme subunit 2                                  | Cytoplasm           | enzyme                            |
|          | NM_019575 | SCAMP4  | secretory carrier membrane protein 4                               | Unknown             | other                             |
|          | NM_015749 | TCN2    | transcobalamin II; macrocytic anemia                               | Extracellular Space | transporter                       |
|          | Y08975    | UNG     | uracil-DNA glycosylase                                             | Nucleus             | enzyme                            |
|          | NM_009480 | USF1    | upstream transcription factor 1                                    | Nucleus             | transcription regulator           |
| LPS      |           |         |                                                                    |                     |                                   |
| MUCOSA   | ID        | Genes   | Description                                                        | Location            | Type                              |
|          | NM_008339 | CD79B   | CD79b molecule, immunoglobulin-associated beta                     | Plasma Membrane     | transmembrane receptor            |
|          | NM_019500 | CLDN14  | claudin 14                                                         | Plasma Membrane     | other                             |
|          | NM_009990 | CLIP2   | CAP-GLY domain containing linker protein 2                         | Cytoplasm           | transcription regulator           |
|          | U55075    | F2R     | coagulation factor II (thrombin) receptor                          | Plasma Membrane     | G-protein coupled receptor        |
|          | NM_008104 | GCM2    | glial cells missing homolog 2 (Drosophila)                         | Nucleus             | transcription regulator           |
|          | NM_013569 | KCNH2   | potassium voltage-gated channel, subfamily H                       | Plasma Membrane     | ion channel                       |
|          | NM_019648 | METAP2  | methionyl aminopeptidase 2                                         | Cytoplasm           | peptidase                         |
|          | NM_008605 | MMP12   | matrix metalloproteinase 12 (macrophage elastase)                  | Extracellular Space | peptidase                         |
|          | NM_008731 | NPY2R   | neuropeptide Y receptor Y2                                         | Plasma Membrane     | G-protein coupled receptor        |
|          | NM_011850 | NR0B2   | nuclear receptor subfamily 0, group B, member 2                    | Nucleus             | ligand-dependent nuclear receptor |
|          | NM_008737 | NRP1    | neuropilin 1                                                       | Plasma Membrane     | transmembrane receptor            |
|          | NM_020292 | OLFR672 | olfactory receptor 672                                             | Plasma Membrane     | G-protein coupled receptor        |
|          | NM_008860 | PRKCZ   | protein kinase C, zeta                                             | Cytoplasm           | kinase                            |
|          | NM_011206 | PTPN18  | protein tyrosine phosphatase, non-receptor type 18 (brain-derived) | Nucleus             | phosphatase                       |
|          | NM_019713 | RASSF1  | Ras association (RalGDS/AF-6) domain family 1                      | Nucleus             | other                             |
|          | NM_009529 | SLX     | Sycp3 like X-linked                                                | Nucleus             | other                             |
|          | NM_013679 | SVS6    | seminal vesicle secretory protein 6                                | Extracellular Space | other                             |
|          | NM_019981 | TEX101  | testis expressed 101                                               | Unknown             | other                             |
