# Supplementary material for: Molecular networks discriminating mouse bladder responses to intravesical bacillus Calmette-Guerin (BCG), LPS, and TNF-α
Source: PubMed Central journal article supplement (PMC2262873; doi:10.1186/1471-2172-9-4), 2008-02-11
Supplement: 1471-2172-9-4-S3.pdf [file 1471-2172-9-4-S3.pdf]

Table 3

| ID       | Gene      | Description                                                                  | Location            | Type                              |
|----------|-----------|------------------------------------------------------------------------------|---------------------|-----------------------------------|
| BCG      |           |                                                                              |                     |                                   |
| DETRUSOR | NM_019816 | apoptosis antagonizing transcription factor                                  | Nucleus             | transcription regulator           |
|          | NM_007422 | adenylosuccinate synthase                                                    | Cytoplasm           | enzyme                            |
|          | NM_017402 | Rho guanine nucleotide exchange factor (GEF) 7                               | Cytoplasm           | other                             |
|          | NM_007890 | AT rich interactive domain 3A (BRIGHT-like)                                  | Nucleus             | transcription regulator           |
|          | NM_019685 | ADP-ribosylation factor-like 6                                               | Cytoplasm           | transporter                       |
|          | NM_007490 | ADP-ribosyltransferase 2a                                                    | Extracellular Space | enzyme                            |
|          | NM_011797 | carbonic anhydrase XIV                                                       | Plasma Membrane     | enzyme                            |
|          | L22844    | CD22 molecule                                                                | Plasma Membrane     | other                             |
|          | NM_010016 | CD55 molecule, decay accelerating factor for complement                      | Plasma Membrane     | other                             |
|          | L25606    | CD86 molecule                                                                | Plasma Membrane     | transmembrane receptor            |
|          | AB008811  | cadherin 2, type 1, N-cadherin (neuronal)                                    | Plasma Membrane     | other                             |
|          | NM_017478 | costomer protein complex, subunit gamma 2                                    | Cytoplasm           | transporter                       |
|          | NM_011991 | COP9 constitutive photomorphogenic homolog subunit 3                         | Cytoplasm           | other                             |
|          | U05247    | c-src tyrosine kinase                                                        | Cytoplasm           | kinase                            |
|          | U90331    | catenin (cadherin-associated protein), delta 2                               | Plasma Membrane     | other                             |
|          | NM_010046 | diacylglycerol O-acyltransferase homolog 1                                   | Cytoplasm           | enzyme                            |
|          | NM_016811 | diacylglycerol kinase, alpha 80kDa                                           | Cytoplasm           | kinase                            |
|          | NM_007939 | DEAH (Asp-Glu-Ala-His) box polypeptide 15                                    | Nucleus             | enzyme                            |
|          | NM_015775 | DnaI (Hsp40) homolog, subfamily C, member 5                                  | Plasma Membrane     | other                             |
|          | NM_019680 | E74-like factor 4 (ets domain transcription factor)                          | Nucleus             | transcription regulator           |
|          | Z32815    | ELK3, ETS-domain protein (SRF accessory protein 2)                           | Nucleus             | transcription regulator           |
|          | U72523    | enabled homolog (Drosophila)                                                 | Cytoplasm           | other                             |
|          | U39643    | Fas (TNFRSF5) associated factor 1                                            | Nucleus             | other                             |
|          | NM_008033 | farnesyltransferase, CAAX box, alpha                                         | Cytoplasm           | enzyme                            |
|          | NM_010259 | GBP2 (includoguanlylate binding protein 2, interferon-inducible)             | Cytoplasm           | enzyme                            |
|          | NM_008137 | guanine nucleotide binding protein (G protein), alpha 14                     | Plasma Membrane     | enzyme                            |
|          | NM_013331 | guanine nucleotide binding protein (G protein), beta polypeptide 4           | Plasma Membrane     | enzyme                            |
|          | NM_010316 | guanine nucleotide binding protein (G protein), gamma 3                      | Plasma Membrane     | enzyme                            |
|          | NM_010382 | HLA-DRB1                                                                     | Plasma Membrane     | transmembrane receptor            |
|          | NM_010467 | homeobox D1                                                                  | Cytoplasm           | transcription regulator           |
|          | NM_010473 | histidine rich calcium binding protein                                       | Cytoplasm           | other                             |
|          | U39391    | 5-hydroxytryptamine (serotonin) receptor 1A                                  | Plasma Membrane     | G-protein coupled receptor        |
|          | NM_011772 | IKAROS family zinc finger 4 (Eos)                                            | Nucleus             | transcription regulator           |
|          | M84748    | interleukin 9 receptor                                                       | Plasma Membrane     | transmembrane receptor            |
|          | NM_001208 | integrin, alpha M (complement component 3 receptor 3 subunit)                | Plasma Membrane     | other                             |
|          | NM_010596 | potassium voltage-gated channel, shaker-related subfamily, member 7          | Plasma Membrane     | ion channel                       |
|          | U65591    | potassium voltage-gated channel, shaker-related subfamily, beta member 1     | Plasma Membrane     | ion channel                       |
|          | M42229    | potassium voltage-gated channel, Shab-related subfamily, member 1            | Plasma Membrane     | ion channel                       |
|          | NM_008467 | karyopherin alpha 4 (importin alpha 3)                                       | Nucleus             | transporter                       |
|          | NM_007947 | lipocalin 5                                                                  | Cytoplasm           | enzyme                            |
|          | M17015    | lymphotxin alpha (TNF superfamily, member 1)                                 | Extracellular Space | cytokine                          |
|          | D13759    | mitogen-activated protein kinase kinase kinase 8                             | Cytoplasm           | kinase                            |
|          | NM_008590 | mesoderm specific transcript homolog (mouse)                                 | Extracellular Space | peptidase                         |
|          | NM_011845 | midline 2                                                                    | Cytoplasm           | other                             |
|          | U43548    | MAK-like protein X                                                           | Nucleus             | transcription regulator           |
|          | NM_008609 | matrix metalloproteinase 15 (membrane-inserted)                              | Extracellular Space | peptidase                         |
|          | X81143    | mutS homolog 2, colon cancer, nonpolyposis type 1 (E. coli)                  | Nucleus             | enzyme                            |
|          | NM_008657 | myogenic factor 6 (herculin)                                                 | Nucleus             | transcription regulator           |
|          | X59060    | myogenic factor 6 (herculin)                                                 | Nucleus             | transcription regulator           |
|          | L00923    | myosin IB                                                                    | Cytoplasm           | other                             |
|          | NM_019825 | nuclear receptor coactivator 6                                               | Nucleus             | transcription regulator           |
|          | NM_011060 | peptidyl arginine deiminase, type III                                        | Cytoplasm           | enzyme                            |
|          | NM_011294 | phosphatidylinositol glycan anchor biosynthesis, class N                     | Cytoplasm           | enzyme                            |
|          | NM_008845 | phosphatidylinositol-4-phosphate 5-kinase, type II, alpha                    | Cytoplasm           | kinase                            |
|          | X62701    | PLAUR                                                                        | Plasma Membrane     | transmembrane receptor            |
|          | NM_011104 | protein kinase C, epsilon                                                    | Cytoplasm           | kinase                            |
|          | NM_008858 | protein kinase D1                                                            | Cytoplasm           | kinase                            |
|          | NM_011172 | proline dehydrogenase (oxidase) 1                                            | Cytoplasm           | enzyme                            |
|          | NM_011969 | proteasome (prosome, macropain) subunit, alpha type, 7                       | Cytoplasm           | peptidase                         |
|          | NM_011214 | protein tyrosine phosphatase, receptor type, U                               | Plasma Membrane     | phosphatase                       |
|          | NM_009017 | retinoic acid early transcript beta                                          | Plasma Membrane     | other                             |
|          | NM_009067 | retA binding protein 1                                                       | Cytoplasm           | enzyme                            |
|          | NM_009327 | RASGEF2                                                                      | Cytoplasm           | other                             |
|          | NM_019870 | REV1 homolog (S. cerevisiae)                                                 | Nucleus             | enzyme                            |
|          | NM_017395 | retinoyl factor X, 5 (influenza HLA class II expression)                     | Nucleus             | transcription regulator           |
|          | NM_013876 | ring finger protein 11                                                       | Nucleus             | other                             |
|          | NM_019996 | RNA U1, small nuclear RNA export adaptor                                     | Unknown             | other                             |
|          | NM_009071 | Rho-associated, coiled-coil containing protein kinase 1                      | Cytoplasm           | kinase                            |
|          | NM_009113 | S100 calcium binding protein A13                                             | Cytoplasm           | other                             |
|          | NM_016717 | selenocysteine lyase                                                         | Cytoplasm           | enzyme                            |
|          | L26179    | SCN1A                                                                        | Plasma Membrane     | ion channel                       |
|          | NM_011345 | selectin E (endothelial adhesion molecule 1)                                 | Plasma Membrane     | other                             |
|          | X97817    | semaphorin 5A                                                                | Plasma Membrane     | transmembrane receptor            |
|          | NM_013781 | SH2 domain containing 3C                                                     | Cytoplasm           | other                             |
|          | NM_009197 | solute carrier family 15, member 2                                           | Plasma Membrane     | transporter                       |
|          | NM_011391 | SLC16A7                                                                      | Plasma Membrane     | transporter                       |
|          | NM_011396 | SLC22A5                                                                      | Plasma Membrane     | transporter                       |
|          | NM_009211 | SMARCC1                                                                      | Nucleus             | transcription regulator           |
|          | D49473    | SRY (sex determining region Y)-box 17                                        | Nucleus             | transcription regulator           |
|          | NM_011564 | sex determining region Y                                                     | Nucleus             | transcription regulator           |
|          | NM_019637 | serine/threonine/tyrosine interacting protein                                | Cytoplasm           | phosphatase                       |
|          | NM_020254 | serinal vesicle secretory protein 7                                          | Extracellular Space | other                             |
|          | NM_009532 | tumor-associated calcium signal transducer 1                                 | Plasma Membrane     | other                             |
|          | NM_011549 | transcription factor EB                                                      | Nucleus             | transcription regulator           |
|          | NM_011599 | transducin-like enhancer of split 1                                          | Nucleus             | transcription regulator           |
|          | NM_011626 | transmembrane protein 165                                                    | Plasma Membrane     | other                             |
|          | NM_009462 | ubiquitin specific peptidase 10                                              | Cytoplasm           | peptidase                         |
|          | NM_009500 | vav 2 oncogene                                                               | Extracellular Space | cytokine                          |
|          | M84467    | vascular cell adhesion molecule 1                                            | Plasma Membrane     | other                             |
|          | NM_016873 | WNT1 inducible signaling pathway protein 2                                   | Extracellular Space | other                             |
|          | NM_012017 | zinc finger protein 346                                                      | Nucleus             | other                             |
|          | M88502    | zinc finger protein 436                                                      | Nucleus             | other                             |
| BCG      |           |                                                                              |                     |                                   |
| MUCOSA   |           |                                                                              |                     |                                   |
|          | NM_019774 | A kinase (PRKA) anchor protein 8                                             | Nucleus             | other                             |
|          | AF064071  | apoptotic peptidase activating factor 1                                      | Cytoplasm           | other                             |
|          | Y16256    | basigin (Ok blood group)                                                     | Plasma Membrane     | other                             |
|          | NM_020336 | calmodulin-like 5                                                            | Cytoplasm           | other                             |
|          | NM_016739 | cell cycle associated protein 1                                              | Plasma Membrane     | other                             |
|          | NM_009808 | caspase 12                                                                   | Cytoplasm           | peptidase                         |
|          | NM_007986 | dystrobrevin, beta                                                           | Plasma Membrane     | other                             |
|          | NM_010064 | dysyin, cytoplasmic 1, intermediate chain 2                                  | Cytoplasm           | other                             |
|          | U52951    | enhancer of zeste homolog 2 (Drosophila)                                     | Nucleus             | transcription regulator           |
|          | NM_013857 | Fc fragment of IgE, low affinity II, receptor for (CD23)                     | Plasma Membrane     | other                             |
|          | NM_019873 | FKBP1                                                                        | Unknown             | other                             |
|          | L36434    | GNPTAB                                                                       | Unknown             | enzyme                            |
|          | NM_019691 | glutamate receptor, ionotropic, AMPA 4                                       | Plasma Membrane     | ion channel                       |
|          | M13226    | granzyme A (granzyme 1, cytotoxic T-lymphocyte-associated serine esterase 3) | Cytoplasm           | peptidase                         |
|          | NM_013546 | HEBP1                                                                        | Cytoplasm           | other                             |
|          | Z50013    | HRAS                                                                         | Plasma Membrane     | enzyme                            |
|          | NM_008313 | HTR4                                                                         | Plasma Membrane     | G-protein coupled receptor        |
|          | X15181    | IGFBP3                                                                       | Extracellular Space | other                             |
|          | NM_008324 | INDO                                                                         | Cytoplasm           | enzyme                            |
|          | AB005141  | KL                                                                           | Extracellular Space | enzyme                            |
|          | U69270    | LDB1                                                                         | Nucleus             | transcription regulator           |
|          | NM_013590 | LIZ                                                                          | Extracellular Space | enzyme                            |
|          | NM_008641 | microtubule associated serine/threonine kinase 2                             | Cytoplasm           | kinase                            |
|          | NM_013839 | NR1H3                                                                        | Nucleus             | ligand-dependent nuclear receptor |
|          | NM_017340 | NR1P1                                                                        | Nucleus             | transcription regulator           |
|          | NM_008794 | PCSK7                                                                        | Cytoplasm           | peptidase                         |
|          | NM_019540 | PFPL                                                                         | Unknown             | other                             |
|          | NM_019762 | PKP3                                                                         | Plasma Membrane     | other                             |
|          | NM_011121 | PKL1                                                                         | Nucleus             | kinase                            |
|          | L12667    | PNMT                                                                         | Cytoplasm           | enzyme                            |
|          | NM_008911 | PPOX                                                                         | Cytoplasm           | enzyme                            |
|          | U03873    | PRRX1                                                                        | Nucleus             | transcription regulator           |
|          | NM_011180 | PSCD1                                                                        | Cytoplasm           | other                             |
|          | NM_011730 | pleckstrin homolog, Sec7 and coiled-coil domains 1 (cytosolin 1)             | Plasma Membrane     | transporter                       |
|          | NM_008542 | SMAD6                                                                        | Nucleus             | transcription regulator           |
|          | NM_011467 | SPR                                                                          | Cytoplasm           | enzyme                            |
|          | NM_019876 | THSD1                                                                        | Unknown             | other                             |
|          | NM_016792 | thioredoxin-like 1                                                           | Cytoplasm           | enzyme                            |
|          | NM_009493 | V2R4                                                                         | Plasma Membrane     | other                             |
|          | NM_011776 | ZP3                                                                          | Extracellular Space | other                             |
| BCG      |           |                                                                              |                     |                                   |
| DETRUSOR | L23971    | FMR1                                                                         | Nucleus             | other                             |
| AND      | L34290    | GNBS                                                                         | Plasma Membrane     | enzyme                            |
| MUCOSA   | J03958    | GSTA5                                                                        | Cytoplasm           | enzyme                            |
|          | NM_019508 | IL17B                                                                        | Extracellular Space | cytokine                          |
|          | M17015    | LTA                                                                          | Extracellular Space | cytokine                          |
|          | NM_010745 | LY96                                                                         | Plasma Membrane     | other                             |
|          | NM_008976 | PTPN14                                                                       | Cytoplasm           | phosphatase                       |
|          | NM_011443 | SOX2                                                                         | Nucleus             | transcription regulator           |
|          | NM_009301 | SV55                                                                         | Extracellular Space | other                             |
