# Supplementary material for: Molecular networks discriminating mouse bladder responses to intravesical bacillus Calmette-Guerin (BCG), LPS, and TNF-α
Source: PubMed Central journal article supplement (PMC2262873; doi:10.1186/1471-2172-9-4), 2008-02-11
Supplement: 1471-2172-9-4-S4.pdf [file 1471-2172-9-4-S4.pdf]

**Table 4A Mouse Primers**

| <i>PRIMER</i> | <i>FORWARD</i>         | <i>REVERSE</i>        |
|---------------|------------------------|-----------------------|
| ARL6          | gcgctctcccaaaagtaata   | gcaaaggacgtgaaggaaag  |
| DNAJC5        | gtgcatggtgctcacaggta   | tttgctgtagttgctcaca   |
| CSK           | gccctcaaagcacagatgtt   | ggcccagctactcaggactt  |
| FAF1          | gctcaggccagctctaattgtt | ctctgggcacaagtcttttag |
| Fkbp1         | ggagatggaggctatggagaa  | gtcagcagcagtcggagag   |
| GBP2          | tgtgcccaatgaaaaataa    | cagaggaggaggtcggattc  |
| GZMA          | agcccaaaagggtcaagact   | tcctcaagaaagccacatt   |
| HLA-DRB1      | gggtttcagattttgtctgtt  | caattaggaccacctcaatca |
| Igfbp3        | ccttcacgcttctctatcag   | caccaacgtatcacccacag  |
| IL17b         | ctttcccactctcccagac    | caaccaaccaacgccttac   |
| INDO          | ccgttagggtggaaatggat   | tgcccaagaagtagtctttc  |
| MAP3K8        | caggaccagagggacagta    | tgacttcaccagccaaagtg  |
| SELE          | gatggctgtgatggctgt     | gtttgaccaggaggatctg   |
| SMAD6         | agggacagagtcggagtca    | tgaggctgtctcaggtaaa   |
| TFEB          | tgggctctgtgtaggtagg    | ctaggagggggtcaatcag   |
| VCAM1         | tctagctcctcaccctgtg    | ttgaatccagaaagctcctc  |
| WISP2         | gaggcttgagaggtgacag    | cccagagttgctgcttgc    |
| Untr          | tcaggcatgaaccaccatac   | aacatccacacgtccagtga  |

**Table 4B Human Primers used in the J82 cell line**

| <i>PRIMER</i> | <i>FORWARD</i>         | <i>REVERSE</i>         |
|---------------|------------------------|------------------------|
| Untr12        | TGGACCTTTACCTGCTTTATCA | AGCAAGGACTAGGATGACAGAA |
| CXCL10        | TGGGGCTAGTGTGCCATATT   | AGCCAGCAGGTTTTGCTAAG   |
| CXCL2         | cgggagttacgcaagacag    | atggttggggctggaaag     |
| ICAM1         | TGCAAGAAGATAGCCAACCA   | acgagcaagtggcaaagatt   |
| IL6           | cctcaccctccaacaagat    | gcctcagacatctccagtcc   |
| IL8           | aatgaaaagatgaggggtgcat | GCTTGTGTGCTCTGCTGTCT   |
